# Supplementary material for: Klarigi: Characteristic Explanations for Semantic Data
Source: bioRxiv or medRxiv preprint supplement (doi:10.1101/2021.06.14.448423), 2022-08-30
Supplement: Supplementary file [file media-1.pdf]

# Supplementary Material

## Design and Implementation

**Data:**  $nPerm$  = Number of monte carlo permutations

$AE$  = All unique classes in  $O$  that appear in  $E$

**Result:**  $testDist$  = Sorted list of calculated test statistics,  $length = nPerm + 1$

$pValue$  = Calculated empirical p-value

**for**  $n$  *in*  $nPerm$  **do**

$ET_j = |E|$

**for**  $p$  *in*  $E$  **do**

$ET_{jp} = random\_sample(AE, length(E_p))$

**end**

$testDist_n = calculate\_inclusion\_and\_exclusion(ET)$

**end**

$testDist = rank(testDist)$ ;

$r = length(testStat \geq testDist)$ ;

$pValue = \frac{r+1}{nPerm+1}$ ;

**return**  $pValue$ ;

**Algorithm 1:** Algorithm for generating p-values for inclusion and exclusion scores through permutation.

## Use Case: Pulmonary Embolism

Table 1: Multivariable Klarigi results for pneumonia and pulmonary embolism considered without control. Resnik IC was used, with other parameters set to default.

|                                                    |                  |           | <b>pulmonary embolism (233 members)</b>                          |              | <b>Inclusion</b> | <b>IC</b> |
|----------------------------------------------------|------------------|-----------|------------------------------------------------------------------|--------------|------------------|-----------|
|                                                    |                  |           | Dyspnea (HP:0002094)                                             | 0.9          | 0.83             |           |
|                                                    |                  |           | Chest pain (HP:0100749)                                          | 0.78         | 0.95             |           |
|                                                    |                  |           | Abnormal systemic blood pressure (HP:0030972)                    | 0.75         | 0.76             |           |
|                                                    |                  |           | Increased blood pressure (HP:0032263)                            | 0.66         | 0.83             |           |
|                                                    |                  |           | Hypertension (HP:0000822)                                        | 0.65         | 0.89             |           |
|                                                    |                  |           | Abnormal breath sound (HP:0030829)                               | 0.6          | 0.8              |           |
|                                                    |                  |           | Cough (HP:0012735)                                               | 0.51         | 0.87             |           |
|                                                    |                  |           | Crackles (HP:0030830)                                            | 0.49         | 0.92             |           |
|                                                    |                  |           | Abnormal heart valve physiology (HP:0031653)                     | 0.48         | 0.8              |           |
|                                                    |                  |           | Abnormality of temperature regulation (HP:0004370)               | 0.47         | 0.77             |           |
|                                                    |                  |           | Nausea and vomiting (HP:0002017)                                 | 0.47         | 0.89             |           |
|                                                    |                  |           | Fever (HP:0001945)                                               | 0.45         | 0.83             |           |
|                                                    |                  |           | Abnormal pericardium morphology (HP:0001697)                     | 0.45         | 0.76             |           |
|                                                    |                  |           | Pericardial effusion (HP:0001698)                                | 0.45         | 0.92             |           |
|                                                    |                  |           | Abnormal pleura morphology (HP:0002103)                          | 0.44         | 0.74             |           |
|                                                    |                  |           | Abnormal atrioventricular valve physiology (HP:0031650)          | 0.43         | 0.87             |           |
|                                                    |                  |           | Abnormal aortic valve physiology (HP:0031652)                    | 0.43         | 0.92             |           |
|                                                    |                  |           | Nausea (HP:0002018)                                              | 0.42         | 1.0              |           |
|                                                    |                  |           | Chills (HP:0025143)                                              | 0.42         | 1.0              |           |
|                                                    |                  |           | Abnormal thrombosis (HP:0001977)                                 | 0.41         | 0.75             |           |
|                                                    |                  |           | Aortic regurgitation (HP:0001659)                                | 0.39         | 1.0              |           |
|                                                    |                  |           | Mitral regurgitation (HP:0001653)                                | 0.39         | 1.0              |           |
|                                                    |                  |           | Abnormal mitral valve physiology (HP:0031481)                    | 0.39         | 0.92             |           |
|                                                    |                  |           | Diarrhea (HP:0002014)                                            | 0.39         | 0.8              |           |
|                                                    |                  |           | Vomiting (HP:0002013)                                            | 0.38         | 0.92             |           |
|                                                    |                  |           | Constipation (HP:0002019)                                        | 0.38         | 0.95             |           |
|                                                    |                  |           | Venous thrombosis (HP:0004936)                                   | 0.37         | 0.83             |           |
|                                                    |                  |           | Hypotension (HP:0002615)                                         | 0.35         | 0.87             |           |
|                                                    |                  |           | Dermatological manifestations of systemic disorders (HP:0001005) | 0.35         | 0.84             |           |
|                                                    |                  |           | Abdominal pain (HP:0002027)                                      | 0.35         | 0.84             |           |
|                                                    |                  |           | Abnormal cell morphology (HP:0025461)                            | 0.34         | 0.73             |           |
|                                                    |                  |           | Abnormal myeloid cell morphology (HP:0020047)                    | 0.34         | 0.92             |           |
|                                                    |                  |           | Pleural effusion (HP:0002202)                                    | 0.34         | 0.89             |           |
|                                                    |                  |           | Atelectasis (HP:0100750)                                         | 0.33         | 0.95             |           |
|                                                    |                  |           | Deep venous thrombosis (HP:0002625)                              | 0.33         | 1.0              |           |
|                                                    |                  |           | Hyperlipidemia (HP:0003077)                                      | 0.33         | 0.95             |           |
|                                                    |                  |           | Cyanosis (HP:0000961)                                            | 0.32         | 0.92             |           |
|                                                    |                  |           | Abnormal erythroid lineage cell morphology (HP:0012130)          | 0.3          | 0.92             |           |
|                                                    |                  |           | Abnormality of body weight (HP:0004323)                          | 0.3          | 0.73             |           |
|                                                    |                  |           | Tachycardia (HP:0001649)                                         | 0.3          | 0.74             |           |
|                                                    |                  |           | Impairment in personality functioning (HP:0031466)               | 0.3          | 0.72             |           |
|                                                    |                  |           | <i>Overall</i>                                                   | <i>100.0</i> | -                |           |
| <b>pneumonia (552 members)</b>                     | <b>Inclusion</b> | <b>IC</b> |                                                                  |              |                  |           |
| Dyspnea (HP:0002094)                               | 0.89             | 0.83      |                                                                  |              |                  |           |
| Abnormal breath sound (HP:0030829)                 | 0.81             | 0.8       |                                                                  |              |                  |           |
| Cough (HP:0012735)                                 | 0.78             | 0.87      |                                                                  |              |                  |           |
| Abnormal systemic blood pressure (HP:0030972)      | 0.76             | 0.76      |                                                                  |              |                  |           |
| Chest pain (HP:0100749)                            | 0.64             | 0.95      |                                                                  |              |                  |           |
| Increased blood pressure (HP:0032263)              | 0.64             | 0.83      |                                                                  |              |                  |           |
| Hypertension (HP:0000822)                          | 0.64             | 0.89      |                                                                  |              |                  |           |
| Abnormality of temperature regulation (HP:0004370) | 0.63             | 0.77      |                                                                  |              |                  |           |
| Fever (HP:0001945)                                 | 0.62             | 0.83      |                                                                  |              |                  |           |
| Crackles (HP:0030830)                              | 0.62             | 0.92      |                                                                  |              |                  |           |
| <i>Overall</i>                                     | <i>99.28</i>     | -         |                                                                  |              |                  |           |

Table 2: All univariate scores for pulmonary embolism, derived by Klarigi with default parameters, using Resnik IC.

| <b>Class</b>                     | <b>Power</b> | <b>Inclusivity</b> | <b>Exclusivity</b> | <b>Specificity</b> |
|----------------------------------|--------------|--------------------|--------------------|--------------------|
| Abnormal thrombosis (HP:0001977) | 0.37         | 0.41               | 0.35               | 0.75               |

Table 2 – continued from previous page

| Class                                              | Power | Inclusivity | Exclusivity | Specificity |
|----------------------------------------------------|-------|-------------|-------------|-------------|
| Venous thrombosis (HP:0004936)                     | 0.35  | 0.37        | 0.34        | 0.83        |
| Deep venous thrombosis (HP:0002625)                | 0.33  | 0.33        | 0.34        | 1.0         |
| Abnormality of coagulation (HP:0001928)            | 0.22  | 0.15        | 0.41        | 0.61        |
| Hypercoagulability (HP:0100724)                    | 0.19  | 0.11        | 0.7         | 1.0         |
| Lower limb pain (HP:0012514)                       | 0.18  | 0.14        | 0.26        | 0.89        |
| Limb pain (HP:0009763)                             | 0.18  | 0.14        | 0.25        | 0.84        |
| Pleuritic chest pain (HP:0033771)                  | 0.17  | 0.15        | 0.22        | 1.0         |
| Increased body weight (HP:0004324)                 | 0.17  | 0.15        | 0.19        | 0.84        |
| Sinus tachycardia (HP:0011703)                     | 0.17  | 0.25        | 0.13        | 1.0         |
| Obesity (HP:0001513)                               | 0.15  | 0.13        | 0.17        | 0.87        |
| Abnormality of skin adnexa physiology (HP:0025276) | 0.12  | 0.12        | 0.13        | 0.83        |
| Hyperhidrosis (HP:0000975)                         | 0.12  | 0.12        | 0.13        | 0.95        |
| Hypohidrosis or hyperhidrosis (HP:0007550)         | 0.12  | 0.12        | 0.13        | 0.92        |
| Abnormal exteroceptive sensation (HP:0033747)      | 0.12  | 0.09        | 0.16        | 0.8         |
| Somatic sensory dysfunction (HP:0003474)           | 0.12  | 0.09        | 0.16        | 0.75        |
| Syncope (HP:0001279)                               | 0.12  | 0.09        | 0.16        | 0.89        |
| Thromboembolism (HP:0001907)                       | 0.12  | 0.07        | 0.4         | 0.89        |
| Hiatus hernia (HP:0002036)                         | 0.11  | 0.08        | 0.18        | 1.0         |
| Hypoesthesia (HP:0033748)                          | 0.11  | 0.08        | 0.16        | 1.0         |

Table 3: All univariate scores for pneumonia, derived by Klarigi with default parameters, using Resnik IC.

| Class                                                   | Power | Inclusivity | Exclusivity | Specificity |
|---------------------------------------------------------|-------|-------------|-------------|-------------|
| Renal insufficiency (HP:0000083)                        | 0.22  | 0.39        | 0.15        | 0.84        |
| Airway obstruction (HP:0006536)                         | 0.2   | 0.34        | 0.14        | 0.87        |
| Atrial fibrillation (HP:0005110)                        | 0.2   | 0.27        | 0.15        | 0.95        |
| Respiratory insufficiency (HP:0002093)                  | 0.2   | 0.24        | 0.17        | 0.81        |
| Chronic pulmonary obstruction (HP:0006510)              | 0.2   | 0.33        | 0.14        | 1.0         |
| Respiratory distress (HP:0002098)                       | 0.2   | 0.37        | 0.13        | 0.92        |
| Congestive heart failure (HP:0001635)                   | 0.2   | 0.32        | 0.14        | 0.95        |
| Aspiration (HP:0002835)                                 | 0.19  | 0.29        | 0.15        | 1.0         |
| Respiratory failure (HP:0002878)                        | 0.19  | 0.22        | 0.17        | 1.0         |
| Productive cough (HP:0031245)                           | 0.19  | 0.17        | 0.22        | 1.0         |
| Chronic kidney disease (HP:0012622)                     | 0.18  | 0.17        | 0.21        | 0.87        |
| Atrial arrhythmia (HP:0001692)                          | 0.18  | 0.29        | 0.13        | 0.83        |
| Rhonchi (HP:0030831)                                    | 0.18  | 0.27        | 0.13        | 1.0         |
| Stage 5 chronic kidney disease (HP:0003774)             | 0.17  | 0.13        | 0.24        | 1.0         |
| Confusion (HP:0001289)                                  | 0.17  | 0.18        | 0.15        | 1.0         |
| Abnormality of the upper respiratory tract (HP:0002087) | 0.16  | 0.16        | 0.17        | 0.61        |
| Sepsis (HP:0100806)                                     | 0.16  | 0.17        | 0.15        | 1.0         |
| Respiratory tract infection (HP:0011947)                | 0.15  | 0.13        | 0.18        | 0.73        |
| Abnormality of the pharynx (HP:0000600)                 | 0.15  | 0.12        | 0.19        | 0.74        |
| Pharyngalgia (HP:0033050)                               | 0.14  | 0.11        | 0.18        | 1.0         |
| Abnormal pharynx physiology (HP:0033152)                | 0.14  | 0.11        | 0.18        | 1.0         |
| Nonproductive cough (HP:0031246)                        | 0.13  | 0.09        | 0.22        | 1.0         |
| Abnormal tracheobronchial morphology (HP:0005607)       | 0.13  | 0.11        | 0.16        | 0.67        |
| Delirium (HP:0031258)                                   | 0.12  | 0.1         | 0.17        | 1.0         |
| Abnormal bronchus morphology (HP:0025426)               | 0.12  | 0.1         | 0.16        | 0.72        |
| Malaise (HP:0033834)                                    | 0.12  | 0.08        | 0.23        | 1.0         |
| Hepatitis (HP:0012115)                                  | 0.11  | 0.09        | 0.14        | 0.81        |
| Abnormality of the abdominal wall (HP:0004298)          | 0.1   | 0.08        | 0.16        | 0.73        |

**Table 3 – continued from previous page**

| Class                                                   | Power | Inclusivity | Exclusivity | Specificity |
|---------------------------------------------------------|-------|-------------|-------------|-------------|
| Abnormal pulmonary interstitial morphology (HP:0006530) | 0.1   | 0.07        | 0.17        | 0.65        |

Table 4: Enrichment results for pneumonia and pulmonary embolism

| Pulmonary embolism                       | Binomial |      |         | Fisher |       |         |
|------------------------------------------|----------|------|---------|--------|-------|---------|
|                                          | zscore   | OR   | p       | zscore | OR    | p       |
| Abnormal thrombosis (HP:0001977)         | 9.72     | 1    | 1.4e-11 | 9.72   | 1     | 1.5e-18 |
| Abnormality of coagulation (HP:0001928)  | 6.18     | 1.44 | 0.0014  | 6.18   | 1.44  | 2.1e-06 |
| Hypercoagulability (HP:0100724)          |          |      |         | 4.65   | 1.09  | 0.00062 |
| Pneumonia                                | Binomial |      |         | Fisher |       |         |
|                                          | zscore   | OR   | p       | zscore | OR    | p       |
| Cough (HP:0012735)                       | 7.49     | 1.26 | 0.0088  | 7.49   | 1.26  | 1.4e-10 |
| Abnormal breath sound (HP:0030829)       |          |      |         | 5.94   | 2.78  | 3.9e-06 |
| Respiratory distress (HP:0002098)        |          |      |         | 5.48   | 0.206 | 7.9e-06 |
| Airway obstruction (HP:0006536)          |          |      |         | 5.41   | 1.7   | 1e-05   |
| Congestive heart failure (HP:0001635)    |          |      |         | 5.1    | 0.258 | 6.3e-05 |
| Renal insufficiency (HP:0000083)         |          |      |         | 4.98   | 4.35  | 0.002   |
| Aspiration (HP:0002835)                  |          |      |         | 4.94   | 0.975 | 0.00014 |
| Respiratory insufficiency (HP:0002093)   |          |      |         | 4.92   | 3.31  | 0.00011 |
| Abnormal renal physiology (HP:0012211)   |          |      |         | 4.1    | 1.01  | 0.043   |
| Supraventricular arrhythmia (HP:0005115) |          |      |         | 3.8    | 0.721 | 0.046   |
| Productive cough (HP:0031245)            |          |      |         | 3.71   | 3.72  | 0.038   |
| Malaise (HP:0033834)                     |          |      |         | 3.61   | 0     | 0.042   |

## Use Case: Phenopackets

Table 5: All univariate scores for IHPRF3 (OMIM:616900).

| Class                                                    | r-score | Inclusivity | Exclusivity | IC   |
|----------------------------------------------------------|---------|-------------|-------------|------|
| Severe muscular hypotonia (HP:0006829)                   | 0.8     | 0.68        | 0.95        | 1.0  |
| Developmental regression (HP:0002376)                    | 0.63    | 0.58        | 0.68        | 1.0  |
| Severe global developmental delay (HP:0011344)           | 0.5     | 0.42        | 0.62        | 1.0  |
| Abnormality of upper lip vermillion (HP:0011339)         | 0.46    | 0.47        | 0.45        | 0.83 |
| Respiratory insufficiency (HP:0002093)                   | 0.42    | 0.42        | 0.42        | 0.81 |
| Reduced tendon reflexes (HP:0001315)                     | 0.42    | 0.53        | 0.35        | 0.82 |
| Small basal ganglia (HP:0012697)                         | 0.41    | 0.26        | 0.95        | 1.0  |
| Exaggerated cupid’s bow (HP:0002263)                     | 0.41    | 0.26        | 0.95        | 1.0  |
| Macroglossia (HP:0000158)                                | 0.39    | 0.26        | 0.78        | 0.95 |
| Areflexia (HP:0001284)                                   | 0.39    | 0.32        | 0.5         | 0.89 |
| Abnormality of the basal ganglia (HP:0002134)            | 0.38    | 0.26        | 0.66        | 0.69 |
| Profound global developmental delay (HP:0012736)         | 0.36    | 0.26        | 0.58        | 1.0  |
| Prominent nasal bridge (HP:0000426)                      | 0.36    | 0.26        | 0.58        | 1.0  |
| Skeletal muscle hypertrophy (HP:0003712)                 | 0.35    | 0.26        | 0.51        | 0.78 |
| Sloping forehead (HP:0000340)                            | 0.34    | 0.21        | 0.95        | 1.0  |
| Aplasia/Hypoplasia of the cerebellar vermis (HP:0006817) | 0.33    | 0.26        | 0.45        | 0.87 |
| Highly arched eyebrow (HP:0002553)                       | 0.33    | 0.26        | 0.45        | 1.0  |
| Cerebellar vermis hypoplasia (HP:0001320)                | 0.33    | 0.26        | 0.45        | 0.95 |
| Tented upper lip vermilion (HP:0010804)                  | 0.31    | 0.21        | 0.62        | 1.0  |
| Coarse facial features (HP:0000280)                      | 0.29    | 0.26        | 0.34        | 1.0  |
| Small forehead (HP:0000350)                              | 0.29    | 0.26        | 0.34        | 1.0  |
| Narrow forehead (HP:0000341)                             | 0.29    | 0.26        | 0.34        | 1.0  |

Table 5 – continued from previous page

| Class                                                                | r-score | Inclusivity | Exclusivity | IC   |
|----------------------------------------------------------------------|---------|-------------|-------------|------|
| Aplasia/Hypoplasia of the corpus callosum (HP:0007370)               | 0.29    | 0.37        | 0.24        | 0.95 |
| Aplasia/Hypoplasia of the cerebral white matter (HP:0012429)         | 0.29    | 0.37        | 0.24        | 0.95 |
| EEG abnormality (HP:0002353)                                         | 0.29    | 0.32        | 0.27        | 0.58 |
| Hypoplasia of the corpus callosum (HP:0002079)                       | 0.29    | 0.32        | 0.27        | 1.0  |
| Abnormality of muscle size (HP:0030236)                              | 0.29    | 0.32        | 0.27        | 0.63 |
| Cerebral white matter hypoplasia (HP:0012430)                        | 0.29    | 0.32        | 0.27        | 1.0  |
| Brachycephaly (HP:0000248)                                           | 0.29    | 0.21        | 0.45        | 0.95 |
| Absent speech (HP:0001344)                                           | 0.28    | 0.37        | 0.23        | 1.0  |
| Abnormality of the cerebellar vermis (HP:0002334)                    | 0.27    | 0.26        | 0.28        | 0.8  |
| Diffuse cerebellar atrophy (HP:0100275)                              | 0.27    | 0.16        | 0.95        | 1.0  |
| Global brain atrophy (HP:0002283)                                    | 0.27    | 0.16        | 0.95        | 1.0  |
| Abnormality of central nervous system electrophysiology (HP:0030178) | 0.27    | 0.32        | 0.24        | 0.56 |
| Global developmental delay (HP:0001263)                              | 0.26    | 0.95        | 0.15        | 0.89 |
| Open mouth (HP:0000194)                                              | 0.26    | 0.16        | 0.7         | 1.0  |
| Diffuse cerebral atrophy (HP:0002506)                                | 0.26    | 0.16        | 0.7         | 1.0  |
| Seizures (HP:0001250)                                                | 0.26    | 0.79        | 0.15        | 0.62 |
| Visual impairment (HP:0000505)                                       | 0.25    | 0.21        | 0.31        | 0.87 |
| Shallow orbits (HP:0000586)                                          | 0.25    | 0.16        | 0.55        | 1.0  |
| Abnormality of bony orbit of skull (HP:3000030)                      | 0.25    | 0.16        | 0.55        | 0.95 |
| Partial agenesis of the corpus callosum (HP:0001338)                 | 0.25    | 0.16        | 0.55        | 1.0  |
| Abnormality of the corpus callosum (HP:0001273)                      | 0.25    | 0.37        | 0.18        | 0.83 |
| Abnormality of upper lip (HP:0000177)                                | 0.24    | 0.47        | 0.16        | 0.69 |
| Cerebellar malformation (HP:0002438)                                 | 0.24    | 0.26        | 0.23        | 0.74 |
| Muscular hypotonia (HP:0001252)                                      | 0.24    | 0.95        | 0.14        | 0.8  |
| Abnormality of the periorbital region (HP:0000606)                   | 0.24    | 0.53        | 0.15        | 0.65 |
| Deeply set eye (HP:0000490)                                          | 0.24    | 0.32        | 0.19        | 1.0  |
| Abnormal tongue morphology (HP:0030809)                              | 0.24    | 0.26        | 0.21        | 0.69 |
| Abnormality of the tongue (HP:0000157)                               | 0.24    | 0.26        | 0.21        | 0.65 |
| Cerebral atrophy (HP:0002059)                                        | 0.23    | 0.21        | 0.26        | 0.82 |
| Abnormality of the lip (HP:0000159)                                  | 0.23    | 0.53        | 0.15        | 0.62 |
| Focal seizures (HP:0007359)                                          | 0.22    | 0.16        | 0.38        | 0.69 |
| Agenesis of corpus callosum (HP:0001274)                             | 0.22    | 0.16        | 0.38        | 1.0  |
| Osteoporosis (HP:0000939)                                            | 0.22    | 0.16        | 0.38        | 0.92 |
| Atrophy/Degeneration affecting the cerebrum (HP:0007369)             | 0.22    | 0.21        | 0.24        | 0.78 |
| Ventriculomegaly (HP:0002119)                                        | 0.22    | 0.32        | 0.16        | 0.81 |
| Generalized seizures (HP:0002197)                                    | 0.21    | 0.21        | 0.22        | 0.77 |
| Abnormality of the external nose (HP:0010938)                        | 0.21    | 0.42        | 0.14        | 0.67 |
| Abnormality of the cerebral white matter (HP:0002500)                | 0.21    | 0.37        | 0.14        | 0.68 |
| Abnormal nervous system electrophysiology (HP:0001311)               | 0.2     | 0.32        | 0.15        | 0.56 |
| Abnormality of the forehead (HP:0000290)                             | 0.2     | 0.53        | 0.13        | 0.7  |

Table 6: Enrichment results for IHPRF3 (OMIM:616900)

|                                                                      | Binomial |       |         | Fisher |      |         |
|----------------------------------------------------------------------|----------|-------|---------|--------|------|---------|
|                                                                      | zscore   | OR    | p       | zscore | OR   | p       |
| Abnormality of upper lip vermillion (HP:0011339)                     | 9        | 4.14  | 4.7e-07 | 3.86   | Inf  | 0.015   |
| Respiratory insufficiency (HP:0002093)                               | 8.17     | 1.99  | 5.8e-06 | 3.96   | 1.99 | 0.015   |
| Severe muscular hypotonia (HP:0006829)                               | 7.98     | Inf   | 2e-07   | 7.98   | Inf  | 3.3e-10 |
| Developmental regression (HP:0002376)                                | 7.76     | 0     | 1.5e-06 | 7.76   | 0    | 3.2e-07 |
| Muscular hypotonia (HP:0001252)                                      | 7.23     | 0     | 4.4e-10 |        |      |         |
| Cerebellar vermis hypoplasia (HP:0001320)                            | 6.64     | 24.9  | 0.00091 |        |      |         |
| Aplasia/Hypoplasia of the cerebellar vermis (HP:0006817)             | 6.64     | 24.9  | 0.00091 |        |      |         |
| Reduced tendon reflexes (HP:0001315)                                 | 6.23     | 14.7  | 8.2e-05 | 6.23   | 14.7 | 0.00017 |
| Abnormal muscle tone (HP:0003808)                                    | 6.07     | 0     | 4.4e-08 |        |      |         |
| EEG abnormality (HP:0002353)                                         | 5.47     | 0     | 0.0031  |        |      |         |
| Abnormality of the cerebellar vermis (HP:0002334)                    | 5.16     | 0.879 | 0.0089  |        |      |         |
| Abnormality of muscle physiology (HP:0011804)                        | 5.14     | 0.172 | 2e-06   |        |      |         |
| Abnormality of central nervous system electrophysiology (HP:0030178) | 5.12     | 0     | 0.0059  |        |      |         |
| Visual impairment (HP:0000505)                                       | 4.86     | 13.3  | 0.023   |        |      |         |
| Abnormality of the corpus callosum (HP:0001273)                      | 4.82     | 0     | 0.0069  |        |      |         |
| Seizures (HP:0001250)                                                | 4.69     | 0     | 0.00037 | 4.69   | 0    | 0.0014  |
| Abnormality of the musculature (HP:0003011)                          | 4.5      | 24.7  | 3.2e-05 | 4.5    | 24.7 | 0.00046 |
| Abnormality of the tongue (HP:0000157)                               | 4.39     | 12.3  | 0.033   |        |      |         |
| Abnormal tongue morphology (HP:0030809)                              | 4.39     | 0     | 0.033   |        |      |         |
| Severe global developmental delay (HP:0011344)                       | 4.28     | 44.8  | 0.032   | 4.28   | 44.8 | 0.026   |
| Functional respiratory abnormality (HP:0002795)                      | 4.21     | 0     | 0.018   |        |      |         |
| Abnormality of the cerebral white matter (HP:0002500)                | 4.2      | 6.68  | 0.025   |        |      |         |
| Ventriculomegaly (HP:0002119)                                        | 4.16     | 0     | 0.036   |        |      |         |
| Absent speech (HP:0001344)                                           | 3.51     | 11.8  | 0.034   |        |      |         |
| Abnormality of the head (HP:0000234)                                 | 3.47     | Inf   | 0.0024  |        |      |         |
| Abnormality of muscle size (HP:0030236)                              | 3.45     | 0     | 0.026   |        |      |         |
| Abnormality of head or neck (HP:0000152)                             | 3.39     | 1.87  | 0.0035  | 3.39   | 1.87 | 0.038   |
| Aplasia/Hypoplasia of the corpus callosum (HP:0007370)               | 3.22     | 0.344 | 0.038   |        |      |         |
| Neurodevelopmental abnormality (HP:0012759)                          | 3.11     | 0     | 0       |        |      |         |
| Abnormality of the nervous system (HP:0000707)                       | 2.93     | 0     | 0       |        |      |         |
| Neurodevelopmental delay (HP:0012758)                                | 2.29     | 0     | 0       |        |      |         |
| Abnormality of nervous system physiology (HP:0012638)                | 1.6      | Inf   | 0       |        |      |         |

Table 7: HPO database phenotype annotations for IHPRF3 (OMIM:616900)

| <b>Term ID</b> | <b>Label</b>                                     |
|----------------|--------------------------------------------------|
| HP:0002465     | Poor speech                                      |
| HP:0010945     | Fetal pyelectasis                                |
| HP:0001298     | Encephalopathy                                   |
| HP:0001250     | Seizure                                          |
| HP:0001265     | Hyporeflexia                                     |
| HP:0001263     | Global developmental delay                       |
| HP:0002553     | Highly arched eyebrow                            |
| HP:0002518     | Abnormal periventricular white matter morphology |
| HP:0000007     | Autosomal recessive inheritance                  |
| HP:0001320     | Cerebellar vermis hypoplasia                     |
| HP:0002650     | Scoliosis                                        |
| HP:0001321     | Cerebellar hypoplasia                            |
| HP:0000158     | Macroglossia                                     |
| HP:0002093     | Respiratory insufficiency                        |
| HP:0002079     | Hypoplasia of the corpus callosum                |
| HP:0002059     | Cerebral atrophy                                 |
| HP:0002119     | Ventriculomegaly                                 |
| HP:0002263     | Exaggerated cupid's bow                          |
| HP:0100704     | Cerebral visual impairment                       |
| HP:0002376     | Developmental regression                         |
| HP:0010804     | Tented upper lip vermilion                       |
| HP:0006829     | Severe muscular hypotonia                        |
| HP:0012697     | Small basal ganglia                              |
| HP:0006989     | Dysplastic corpus callosum                       |
| HP:0006970     | Periventricular leukomalacia                     |
| HP:0012736     | Profound global developmental delay              |
| HP:0000750     | Delayed speech and language development          |
| HP:0012708     | Reduced brain N-acetyl aspartate level by MRS    |
| HP:0011471     | Gastrostomy tube feeding in infancy              |
| HP:0000286     | Epicanthus                                       |
| HP:0000280     | Coarse facial features                           |
| HP:0000256     | Macrocephaly                                     |
| HP:0000212     | Gingival overgrowth                              |
| HP:0001562     | Oligohydramnios                                  |
| HP:0001558     | Decreased fetal movement                         |
| HP:0001500     | Broad finger                                     |
| HP:0000341     | Narrow forehead                                  |
| HP:0000340     | Sloping forehead                                 |
| HP:0012471     | Thick vermilion border                           |
| HP:0000490     | Deeply set eye                                   |
| HP:0000463     | Anteverted nares                                 |
| HP:0012444     | Brain atrophy                                    |
| HP:0000414     | Bulbous nose                                     |
| HP:0000426     | Prominent nasal bridge                           |
| HP:0001837     | Broad toe                                        |
| HP:0012510     | Extra-axial cerebrospinal fluid accumulation     |

Table 8: Multivariable Klarigi results for the 19 patients with IHPRF3 described in the phenopackets dataset, grouped by the publication they are described in.

| <b>Chong 2016 (5 members)</b>                            | <b>r-score</b> | <b>Inclusion</b> | <b>Exclusion</b> | <b>IC</b> |
|----------------------------------------------------------|----------------|------------------|------------------|-----------|
| Profound global developmental delay (HP:0012736)         | 0.85           | 1.0              | 0.74             | 1.0       |
| Prominent nasal bridge (HP:0000426)                      | 0.85           | 1.0              | 0.74             | 1.0       |
| Abnormality of the nasal alae (HP:0000429)               | 0.85           | 1.0              | 0.74             | 0.82      |
| Abnormality of the nares (HP:0005288)                    | 0.85           | 1.0              | 0.74             | 0.82      |
| Feeding difficulties (HP:0011968)                        | 0.85           | 1.0              | 0.74             | 0.83      |
| Exaggerated cupid's bow (HP:0002263)                     | 0.85           | 1.0              | 0.74             | 1.0       |
| Cerebellar vermis hypoplasia (HP:0001320)                | 0.85           | 1.0              | 0.74             | 0.95      |
| Small forehead (HP:0000350)                              | 0.85           | 1.0              | 0.74             | 1.0       |
| Small basal ganglia (HP:0012697)                         | 0.85           | 1.0              | 0.74             | 1.0       |
| Narrow forehead (HP:0000341)                             | 0.85           | 1.0              | 0.74             | 1.0       |
| Anteverted nares (HP:0000463)                            | 0.85           | 1.0              | 0.74             | 0.95      |
| Aplasia/Hypoplasia of the cerebellar vermis (HP:0006817) | 0.85           | 1.0              | 0.74             | 0.87      |
| Abnormality of the cerebellar vermis (HP:0002334)        | 0.85           | 1.0              | 0.74             | 0.8       |
| Cerebellar malformation (HP:0002438)                     | 0.85           | 1.0              | 0.74             | 0.74      |
| Highly arched eyebrow (HP:0002553)                       | 0.85           | 1.0              | 0.74             | 1.0       |
| <i>Overall</i>                                           | -              | <i>100.0</i>     | -                | -         |
| <b>Zapata-Aldana 2019 (2 members)</b>                    | <b>r-score</b> | <b>Inclusion</b> | <b>Exclusion</b> | <b>IC</b> |
| Impaired social interactions (HP:0000735)                | 0.94           | 1.0              | 0.89             | 0.87      |
| Poor eye contact (HP:0000817)                            | 0.94           | 1.0              | 0.89             | 1.0       |
| Respiratory failure (HP:0002878)                         | 0.94           | 1.0              | 0.89             | 1.0       |
| Abnormal social behavior (HP:0012433)                    | 0.94           | 1.0              | 0.89             | 0.81      |
| Long philtrum (HP:0000343)                               | 0.94           | 1.0              | 0.89             | 1.0       |
| Abnormality of the philtrum (HP:0000288)                 | 0.94           | 1.0              | 0.89             | 0.79      |
| <i>Overall</i>                                           | -              | <i>100.0</i>     | -                | -         |
| <b>Bhoj 2016 (10 members)</b>                            | <b>r-score</b> | <b>Inclusion</b> | <b>Exclusion</b> | <b>IC</b> |
| Cognitive impairment (HP:0100543)                        | 0.6            | 0.8              | 0.47             | 0.77      |
| Intellectual disability (HP:0001249)                     | 0.6            | 0.8              | 0.47             | 0.85      |
| Severe global developmental delay (HP:0011344)           | 0.47           | 0.7              | 0.35             | 1.0       |
| <i>Overall</i>                                           | -              | <i>100.0</i>     | -                | -         |
| <b>Guerreiro 2016 (2 members)</b>                        | <b>r-score</b> | <b>Inclusion</b> | <b>Exclusion</b> | <b>IC</b> |
| Early onset of sexual maturation (HP:0100000)            | 0.94           | 1.0              | 0.89             | 0.83      |
| Overlapping toe (HP:0001845)                             | 0.94           | 1.0              | 0.89             | 1.0       |
| Deep palmar crease (HP:0006191)                          | 0.94           | 1.0              | 0.89             | 1.0       |
| Single transverse palmar crease (HP:0000954)             | 0.94           | 1.0              | 0.89             | 1.0       |
| Abnormal dermatoglyphics (HP:0007477)                    | 0.94           | 1.0              | 0.89             | 0.72      |
| Precocious puberty (HP:0000826)                          | 0.94           | 1.0              | 0.89             | 0.85      |
| Infantile muscular hypotonia (HP:0008947)                | 0.94           | 1.0              | 0.89             | 1.0       |
| Abnormality of the palmar creases (HP:0010490)           | 0.94           | 1.0              | 0.89             | 0.82      |
| Abnormal palmar dermatoglyphics (HP:0001018)             | 0.94           | 1.0              | 0.89             | 0.74      |
| <i>Overall</i>                                           | -              | <i>100.0</i>     | -                | -         |
